# Supplementary material for: How Important are Cereals and Cereal Products in the Average Polish Diet?
Source: MDPI journal article supplement (doi:10.3390/nu11030679), 2019-03-21
Supplement: s1 [file s1]

# How Important are Cereals and Cereal Products in the Average Polish Diet?

## Supplemental Tables

**Table S1.** Food grouping for the purpose of energy and nutrient source analysis

**Table S2.** Food sources of energy contribution from cereals and cereal products in the average Polish diet

**Table S3.** Food sources of carbohydrates contribution from cereals and cereal products in the average Polish diet

**Table S4.** Food sources of protein contribution from cereals and cereal products in the average Polish diet

**Table S5.** Food sources of total fat contribution from cereals and cereal products in the average Polish diet

**Table S6.** Food sources of SFA contribution from cereals and cereal products in the average Polish diet

**Table S7.** Food sources of MUFA contribution from cereals and cereal products in the average Polish diet

**Table S8.** Food sources of PUFA contribution from cereals and cereal products in the average Polish diet

**Table S9.** Food sources of cholesterol contribution from cereals and cereal products in the average Polish diet

**Table S10.** Food sources of dietary fibre contribution from cereals and cereal products in the average Polish diet

**Table S11.** Food sources of calcium contribution from cereals and cereal products in the average Polish diet

**Table S12.** Food sources of phosphorus contribution from cereals and cereal products in the average Polish diet

**Table S13.** Food sources of sodium contribution from cereals and cereal products in the average Polish diet

**Table S14.** Food sources of potassium contribution from cereals and cereal products in the average Polish diet

**Table S15.** Food sources of magnesium contribution from cereals and cereal products in the average Polish diet

**Table S16.** Food sources of iron contribution from cereals and cereal products in the average Polish diet

**Table S17.** Food sources of zinc contribution from cereals and cereal products in the average Polish diet

**Table S18.** Food sources of copper contribution from cereals and cereal products in the average Polish diet

**Table S19.** Food sources of manganese contribution from cereals and cereal products in the average Polish diet

**Table S20.** Food sources of iodine contribution from cereals and cereal products in the average Polish diet

**Table S21.** Food sources of thiamin contribution from cereals and cereal products in the average Polish diet

**Table S22.** Food sources of riboflavin contribution from cereals and cereal products in the average Polish diet

**Table S23.** Food sources of niacin contribution from cereals and cereal products in the average Polish diet

**Table S24.** Food sources of vitamin B6 contribution from cereals and cereal products in the average Polish diet

**Table S25.** Food sources of folate contribution from cereals and cereal products in the average Polish diet

**Table S26.** Food sources of vitamin B12 contribution from cereals and cereal products in the average Polish diet

**Table S27.** Food sources of vitamin A contribution from cereals and cereal products in the average Polish diet

**Table S28.** Food sources of vitamin D contribution from cereals and cereal products in the average Polish diet

**Table S29.** Food sources of vitamin E contribution from cereals and cereal products in the average Polish diet

**Table S30.** Food sources of vitamin C contribution from cereals and cereal products in the average Polish diet

**Table S1.** Food grouping for the purpose of energy and nutrient source analysis

| Food Categories<br>(13) | Main Groups<br>(42)                  | Sub-groups<br>(91)                                                                    |
|-------------------------|--------------------------------------|---------------------------------------------------------------------------------------|
| GRAIN PRODUCTS          | bread, rolls, bread products         | bread and rolls<br>quick breads and bread products                                    |
|                         | rice, cooked grains                  | rice<br>groats and cereal grains                                                      |
|                         | flour, bran, cooking ingredients     | wheat flour<br>other flours                                                           |
|                         | pizza, pasta, and other flour dishes | pasta, macaroni, noodles<br>pizza and other flour dishes                              |
|                         | ready-to-eat cereal                  | breakfast cereals                                                                     |
| MEAT AND MEAT PRODUCTS  | red meat                             | beef<br>pork<br>sheep, goat<br>veal                                                   |
|                         | meat products                        | processed red meat products<br>processed poultry meat products<br>other meat products |
|                         | other meat                           | liver and organ meat<br>minced meat<br>other meat                                     |
|                         | poultry                              | chicken<br>poultry excluding chicken                                                  |
|                         |                                      |                                                                                       |
| MILK AND DAIRY PRODUCTS | milk                                 | whole milk<br>reduced fat milk<br>condensed and powdered milk                         |
|                         | cheese                               | cheeses                                                                               |
|                         | cottage cheese                       | cottage cheese                                                                        |
|                         | yoghurts and milk drinks             | yogurt,<br>milk shakes and other dairy drinks                                         |
| SEAFOOD                 | fish                                 | fresh, chilled or frozen fish                                                         |
|                         | shellfish                            | fresh, chilled or frozen shellfish                                                    |
|                         | processed seafood                    | dried, smoked and salted seafood<br>other fish and shellfish products                 |
| EGGS                    | eggs                                 | eggs                                                                                  |
|                         | butter                               | butter                                                                                |
| FATS AND OILS           | oils, olive                          | olive oil<br>other oils                                                               |
|                         | other fats                           | margarine and other plant fats<br>other animal fats                                   |
|                         | sour cream                           | cream                                                                                 |
|                         |                                      |                                                                                       |
| FRUITS                  | fruits                               | apples                                                                                |
|                         |                                      | bananas                                                                               |
|                         |                                      | berries                                                                               |
|                         |                                      | citrus fruits                                                                         |
|                         |                                      | frozen fruits                                                                         |
|                         |                                      | fruits products<br>other fruits<br>peaches and nectarines                             |

|  |                           |                                  |
|--|---------------------------|----------------------------------|
|  | dried fruits and nuts     | dried fruits and nuts            |
|  | potatoes                  | potatoes                         |
|  |                           | potatoes products                |
|  |                           | beetroot                         |
|  |                           | cabbage                          |
|  |                           | carrots                          |
|  |                           | cauliflower                      |
|  |                           | cucumber                         |
|  |                           | lettuce                          |
|  |                           | onions                           |
|  |                           | tomatoes                         |
|  |                           | frozen vegetables and mushrooms  |
|  |                           | sour cabbage                     |
|  |                           | other vegetables and mushrooms   |
|  |                           | vegetable and mushrooms products |
|  |                           | chocolate                        |
|  | chocolate                 | powdered cacao                   |
|  |                           | powdered chocolate               |
|  | desserts                  | ice-cream                        |
|  | snacks                    | chips                            |
|  | sweet bakery products     | cakes and pies                   |
|  | honey                     | honey                            |
|  |                           | jams                             |
|  | jams, syrups, marmalade   | syrups                           |
|  |                           | marmalade                        |
|  | sugar                     | sugar                            |
|  | sugar substitutes         | sugar substitutes                |
|  | salt                      | salt                             |
|  | juices                    | fruit juices                     |
|  |                           | vegetables and mixed juices      |
|  | other beverages           | other nonalcoholic beverages     |
|  | water                     | water                            |
|  | coffee                    | coffee                           |
|  | tea                       | tea                              |
|  |                           | grape wine                       |
|  | wine                      | high alcohol wine                |
|  |                           | other wine                       |
|  |                           | wine-based beverages             |
|  |                           | beer lager                       |
|  | beer                      | low-alcohol and non-alcohol beer |
|  |                           | other beer                       |
|  |                           | beer-based beverages             |
|  | other alcoholic beverages | liquor and cocktails             |
|  |                           | other alcoholic beverages        |

**Table S2.** Food sources of energy contribution (%) from cereals and cereal products in the average Polish diet

| <b>Main Group<br/>Sub- group</b>         | <b>Rank</b> | <b>% of Energy<br/>Contribution</b> | <b>Cumulative % of<br/>Energy Contribution</b> |
|------------------------------------------|-------------|-------------------------------------|------------------------------------------------|
| <b>Main Group</b>                        |             |                                     |                                                |
| bread, rolls, bread products             | 1           | 21.92                               | 21.92                                          |
| flour, bran, cooking ingredients         | 2           | 3.37                                | 25.29                                          |
| pizza, pasta and other flour<br>dishes   | 3           | 2.60                                | 27.89                                          |
| rice, cooked grains                      | 4           | 1.56                                | 29.44                                          |
| ready-to-eat cereal                      | 5           | 0.96                                | 30.40                                          |
| <b>Sub- group</b>                        |             |                                     |                                                |
| bread and rolls                          | 1           | 16.44                               | 16.44                                          |
| quick breads and other bread<br>products | 2           | 5.48                                | 21.92                                          |
| wheat flour                              | 3           | 3.30                                | 25.22                                          |
| pasta, macaroni, noodles                 | 4           | 2.09                                | 27.30                                          |
| breakfast cereals                        | 5           | 0.96                                | 28.26                                          |
| rice                                     | 6           | 0.89                                | 29.14                                          |
| groats and cereal grains                 | 7           | 0.67                                | 29.81                                          |
| pizza and other flour dishes             | 8           | 0.51                                | 30.33                                          |
| other flours                             | 9           | 0.07                                | 30.40                                          |

**Table S3.** Food sources of carbohydrates contribution from cereals and cereal products in the average Polish diet

| <b>Main Group<br/>Sub-group</b>       | <b>Rank</b> | <b>% of<br/>Carbohydrates<br/>Contribution</b> | <b>Cumulative % of<br/>Carbohydrates<br/>Contribution</b> |
|---------------------------------------|-------------|------------------------------------------------|-----------------------------------------------------------|
| <b>Main Group</b>                     |             |                                                |                                                           |
| bread, rolls, bread products          | 1           | 36.33                                          | 36.33                                                     |
| flour, bran, cooking ingredients      | 2           | 5.92                                           | 42.25                                                     |
| pizza, pasta and other flour dishes   | 3           | 4.21                                           | 46.46                                                     |
| rice, cooked grains                   | 4           | 2.89                                           | 49.35                                                     |
| ready-to-eat cereal                   | 5           | 1.62                                           | 50.97                                                     |
| <b>Sub-group</b>                      |             |                                                |                                                           |
| bread and rolls                       | 1           | 28.76                                          | 28.76                                                     |
| quick breads and other bread products | 2           | 7.57                                           | 36.33                                                     |
| wheat flour                           | 3           | 5.78                                           | 42.12                                                     |
| pasta, macaroni, noodles              | 4           | 3.69                                           | 45.81                                                     |
| rice                                  | 5           | 1.70                                           | 47.51                                                     |
| breakfast cereals                     | 6           | 1.62                                           | 49.13                                                     |
| groats and cereal grains              | 7           | 1.19                                           | 50.32                                                     |
| pizza and other flour dishes          | 8           | 0.52                                           | 50.83                                                     |
| other flours                          | 9           | 0.13                                           | 50.97                                                     |

**Table S4.** Food sources of protein contribution from cereals and cereal products in the average Polish diet

| <b>Main Group<br/>Sub-group</b>          | <b>Rank</b> | <b>% of Protein<br/>Contribution</b> | <b>Cumulative % of<br/>Protein<br/>Contribution</b> |
|------------------------------------------|-------------|--------------------------------------|-----------------------------------------------------|
| <b>Main Group</b>                        |             |                                      |                                                     |
| bread, rolls, bread products             | 1           | 16.49                                | 16.49                                               |
| flour, bran, cooking ingredients         | 2           | 3.10                                 | 19.59                                               |
| pizza, pasta and other flour dishes      | 3           | 2.47                                 | 22.07                                               |
| rice, cooked grains                      | 4           | 1.09                                 | 23.16                                               |
| ready-to-eat cereal                      | 5           | 0.77                                 | 23.93                                               |
| <b>Sub-group</b>                         |             |                                      |                                                     |
| bread and rolls                          | 1           | 13.22                                | 13.22                                               |
| quick breads and other bread<br>products | 2           | 3.27                                 | 16.49                                               |
| wheat flour                              | 3           | 3.05                                 | 19.54                                               |
| pasta, macaroni, noodles                 | 4           | 1.84                                 | 21.38                                               |
| breakfast cereals                        | 5           | 0.77                                 | 22.16                                               |
| pizza and other flour dishes             | 6           | 0.63                                 | 22.79                                               |
| groats and cereal grains                 | 7           | 0.58                                 | 23.37                                               |
| rice                                     | 8           | 0.51                                 | 23.88                                               |
| other flours                             | 9           | 0.05                                 | 23.93                                               |

**Table S5.** Food sources of total fat contribution from cereals and cereal products in the average Polish diet

| <b>Main Group<br/>Sub-group</b>     | <b>Rank</b> | <b>% of Total<br/>Fat<br/>Contribution</b> | <b>Cumulative % of<br/>Total Fat<br/>Contribution</b> |
|-------------------------------------|-------------|--------------------------------------------|-------------------------------------------------------|
| <b>Main Group</b>                   |             |                                            |                                                       |
| bread, rolls, bread products        | 1           | 8.12                                       | 8.12                                                  |
| pizza, pasta and other flour dishes | 2           | 0.84                                       | 8.97                                                  |
| flour, bran, cooking ingredients    | 3           | 0.37                                       | 9.34                                                  |
| ready-to-eat cereal                 | 4           | 0.34                                       | 9.68                                                  |
| rice, cooked grains                 | 5           | 0.19                                       | 9.87                                                  |
| <b>Sub-group</b>                    |             |                                            |                                                       |
| quick breads and other bread        |             |                                            |                                                       |
| products                            | 1           | 4.15                                       | 4.15                                                  |
| bread and rolls                     | 2           | 3.97                                       | 8.12                                                  |
| pizza and other flour dishes        | 3           | 0.51                                       | 8.63                                                  |
| wheat flour                         | 4           | 0.36                                       | 8.99                                                  |
| breakfast cereals                   | 5           | 0.34                                       | 9.33                                                  |
| pasta, macaroni, noodles            | 6           | 0.34                                       | 9.66                                                  |
| groats and cereal grains            | 7           | 0.12                                       | 9.78                                                  |
| rice                                | 8           | 0.07                                       | 9.86                                                  |
| other flours                        | 9           | 0.01                                       | 9.87                                                  |



**Table S6.** Food sources of SFA contribution from cereals and cereal products in the average Polish diet

| <b>Main Group<br/>Sub-group</b>     | <b>Rank</b> | <b>% of SFA<br/>Contribution</b> | <b>Cumulative % of SFA<br/>Contribution</b> |
|-------------------------------------|-------------|----------------------------------|---------------------------------------------|
| <b>Main Group</b>                   |             |                                  |                                             |
| bread, rolls, bread products        | 1           | 6.91                             | 6.91                                        |
| pizza, pasta and other flour dishes | 2           | 0.76                             | 7.67                                        |
| flour, bran, cooking ingredients    | 3           | 0.24                             | 7.91                                        |
| ready-to-eat cereal                 | 4           | 0.17                             | 8.08                                        |
| rice, cooked grains                 | 5           | 0.11                             | 8.19                                        |
| <b>Sub-group</b>                    |             |                                  |                                             |
| quick breads and other bread        |             |                                  |                                             |
| products                            | 1           | 4.56                             | 4.56                                        |
| bread and rolls                     | 2           | 2.35                             | 6.91                                        |
| pizza and other flour dishes        | 3           | 0.53                             | 7.44                                        |
| wheat flour                         | 4           | 0.23                             | 7.68                                        |
| pasta, macaroni, noodles            | 5           | 0.23                             | 7.91                                        |
| breakfast cereals                   | 6           | 0.17                             | 8.07                                        |
| groats and cereal grains            | 7           | 0.06                             | 8.13                                        |
| rice                                | 8           | 0.05                             | 8.18                                        |
| other flours                        | 9           | 0.01                             | 8.19                                        |

**Table S7.** Food sources of MUFA contribution from cereals and cereal products in the average Polish diet

| <b>Main Group<br/>Sub-group</b>     | <b>Rank</b> | <b>% of MUFA<br/>Contribution</b> | <b>Cumulative % of<br/>MUFA Contribution</b> |
|-------------------------------------|-------------|-----------------------------------|----------------------------------------------|
| <b>Main Group</b>                   |             |                                   |                                              |
| bread, rolls, bread products        | 1           | 7.71                              | 7.71                                         |
| pizza, pasta and other flour dishes | 2           | 0.79                              | 8.49                                         |
| ready-to-eat cereal                 | 3           | 0.34                              | 8.83                                         |
| flour, bran, cooking ingredients    | 4           | 0.13                              | 8.97                                         |
| rice, cooked grains                 | 5           | 0.11                              | 9.08                                         |
| <b>Sub-group</b>                    |             |                                   |                                              |
| quick breads and other bread        |             |                                   |                                              |
| products                            | 1           | 4.31                              | 4.31                                         |
| bread and rolls                     | 2           | 3.39                              | 7.71                                         |
| pizza and other flour dishes        | 3           | 0.53                              | 8.23                                         |
| breakfast cereals                   | 4           | 0.34                              | 8.57                                         |
| pasta, macaroni, noodles            | 5           | 0.26                              | 8.83                                         |
| wheat flour                         | 6           | 0.13                              | 8.96                                         |
| groats and cereal grains            | 7           | 0.06                              | 9.02                                         |
| rice                                | 8           | 0.05                              | 9.07                                         |

**Table S8.** Food sources of PUFA contribution from cereals and cereal products in the average Polish diet

| <b>Main Group<br/>Sub-group</b>       | <b>Rank</b> | <b>% of PUFA<br/>Contribution</b> | <b>Cumulative % of<br/>PUFA Contribution</b> |
|---------------------------------------|-------------|-----------------------------------|----------------------------------------------|
| <b>Main Group</b>                     |             |                                   |                                              |
| bread, rolls, bread products          | 1           | 13.63                             | 13.63                                        |
| flour, bran, cooking ingredients      | 2           | 1.35                              | 14.98                                        |
| pizza, pasta and other flour dishes   | 3           | 1.22                              | 16.20                                        |
| ready-to-eat cereal                   | 4           | 0.74                              | 16.93                                        |
| rice, cooked grains                   | 5           | 0.46                              | 17.39                                        |
| <b>Sub-group</b>                      |             |                                   |                                              |
| bread and rolls                       | 1           | 10.07                             | 10.07                                        |
| quick breads and other bread products | 2           | 3.56                              | 13.63                                        |
| wheat flour                           | 3           | 1.32                              | 14.95                                        |
| breakfast cereals                     | 4           | 0.74                              | 15.69                                        |
| pasta, macaroni, noodles              | 5           | 0.73                              | 16.42                                        |
| pizza and other flour dishes          | 6           | 0.48                              | 16.90                                        |
| groats and cereal grains              | 7           | 0.30                              | 17.20                                        |
| rice                                  | 8           | 0.16                              | 17.36                                        |
| other flours                          | 9           | 0.03                              | 17.39                                        |

**Table S9.** Food sources of cholesterol contribution from cereals and cereal products in the average Polish diet

| <b>Main Group<br/>Sub-group</b>     | <b>Rank</b> | <b>% of<br/>Cholesterol<br/>Contribution</b> | <b>Cumulative % of<br/>Cholesterol<br/>Contribution</b> |
|-------------------------------------|-------------|----------------------------------------------|---------------------------------------------------------|
| <b>Main Group</b>                   |             |                                              |                                                         |
| bread, rolls, bread products        | 1           | 4.19                                         | 4.19                                                    |
| pizza, pasta and other flour dishes | 2           | 2.19                                         | 6.38                                                    |
| <b>Sub-group</b>                    |             |                                              |                                                         |
| quick breads and other bread        |             |                                              |                                                         |
| products                            | 1           | 3.54                                         | 3.54                                                    |
| pasta, macaroni, noodles            | 2           | 1.57                                         | 5.11                                                    |
| bread and rolls                     | 3           | 0.66                                         | 5.76                                                    |
| pizza and other flour dishes        | 4           | 0.62                                         | 6.38                                                    |

**Table S10.** Food sources of dietary fibre contribution from cereals and cereal products in the average Polish diet

| <b>Main Group<br/>Sub-group</b>          | <b>Rank</b> | <b>% of Dietary<br/>Fibre<br/>Contribution</b> | <b>Cumulative % of<br/>Dietary Fibre<br/>Contribution</b> |
|------------------------------------------|-------------|------------------------------------------------|-----------------------------------------------------------|
| <b>Food Group</b>                        |             |                                                |                                                           |
| bread, rolls, bread products             | 1           | 35.43                                          | 35.43                                                     |
| flour, bran, cooking ingredients         | 2           | 4.35                                           | 39.77                                                     |
| ready-to-eat cereal                      | 3           | 3.19                                           | 42.97                                                     |
| rice, cooked grains                      | 4           | 2.91                                           | 45.88                                                     |
| pizza, pasta and other flour dishes      | 5           | 2.57                                           | 48.45                                                     |
| <b>Sub-group</b>                         |             |                                                |                                                           |
| bread and rolls                          | 1           | 31.29                                          | 31.29                                                     |
| wheat flour                              | 2           | 4.17                                           | 35.46                                                     |
| quick breads and other bread<br>products | 3           | 4.14                                           | 39.60                                                     |
| breakfast cereals                        | 4           | 3.19                                           | 42.79                                                     |
| pasta, macaroni, noodle                  | 5           | 2.19                                           | 44.98                                                     |
| rice                                     | 6           | 1.48                                           | 46.46                                                     |
| groats and cereal grains                 | 7           | 1.44                                           | 47.90                                                     |
| pizza and other flour dishes             | 8           | 0.38                                           | 48.27                                                     |
| other flours                             | 9           | 0.17                                           | 48.45                                                     |

**Table S11.** Food sources of calcium contribution from cereals and cereal products in the average Polish diet

| <b>Main Group<br/>Sub-group</b>       | <b>Rank</b> | <b>% of Calcium<br/>Contribution</b> | <b>Cumulative % of<br/>Calcium Contribution</b> |
|---------------------------------------|-------------|--------------------------------------|-------------------------------------------------|
| <b>Main Group</b>                     |             |                                      |                                                 |
| bread, rolls, bread products          | 1           | 8.76                                 | 8.76                                            |
| pizza, pasta and other flour dishes   | 2           | 1.43                                 | 10.19                                           |
| flour, bran, cooking ingredients      | 3           | 0.82                                 | 11.01                                           |
| ready-to-eat cereal                   | 4           | 0.62                                 | 11.63                                           |
| rice, cooked grains                   | 5           | 0.32                                 | 11.95                                           |
| <b>Sub-group</b>                      |             |                                      |                                                 |
| bread and rolls                       | 1           | 6.48                                 | 6.48                                            |
| quick breads and other bread products | 2           | 2.29                                 | 8.76                                            |
| pizza and other flour dishes          | 3           | 0.91                                 | 9.67                                            |
| wheat flour                           | 4           | 0.79                                 | 10.46                                           |
| breakfast cereals                     | 5           | 0.62                                 | 11.08                                           |
| pasta, macaroni, noodles              | 6           | 0.52                                 | 11.60                                           |
| groats and cereal grains              | 7           | 0.17                                 | 11.77                                           |
| rice                                  | 8           | 0.15                                 | 11.92                                           |
| other flours                          | 9           | 0.03                                 | 11.95                                           |

**Table S12.** Food sources of phosphorus contribution from cereals and cereal products in the average Polish diet

| <b>Main Group<br/>Sub-group</b>       | <b>Rank</b> | <b>% of<br/>Phosphorus<br/>Contribution</b> | <b>Cumulative % of<br/>Phosphorus<br/>Contribution</b> |
|---------------------------------------|-------------|---------------------------------------------|--------------------------------------------------------|
| <b>Main Group</b>                     |             |                                             |                                                        |
| bread, rolls, bread products          | 1           | 17.56                                       | 17.56                                                  |
| flour, bran, cooking ingredients      | 2           | 2.05                                        | 19.61                                                  |
| pizza, pasta and other flour dishes   | 3           | 2.02                                        | 21.63                                                  |
| rice, cooked grains                   | 4           | 1.84                                        | 23.46                                                  |
| ready-to-eat cereal                   | 5           | 1.53                                        | 24.99                                                  |
| <b>Sub-group</b>                      |             |                                             |                                                        |
| bread and rolls                       | 1           | 14.77                                       | 14.77                                                  |
| quick breads and other bread products | 2           | 2.79                                        | 17.56                                                  |
| wheat flour                           | 3           | 1.97                                        | 19.53                                                  |
| breakfast cereals                     | 4           | 1.53                                        | 21.06                                                  |
| pasta, macaroni, noodles              | 5           | 1.45                                        | 22.51                                                  |
| groats and cereal grains              | 6           | 1.04                                        | 23.55                                                  |
| rice                                  | 7           | 0.80                                        | 24.34                                                  |
| pizza and other flour dishes          | 8           | 0.57                                        | 24.91                                                  |
| other flours                          | 9           | 0.08                                        | 24.99                                                  |

**Table S13.** Food sources of sodium contribution from cereals and cereal products in the average Polish diet

| <b>Main Group<br/>Sub-group</b>       | <b>Rank</b> | <b>% of Sodium<br/>Contribution</b> | <b>Cumulative % of<br/>Sodium Contribution</b> |
|---------------------------------------|-------------|-------------------------------------|------------------------------------------------|
| <b>Main Group</b>                     |             |                                     |                                                |
| bread, rolls, bread products          | 1           | 17.50                               | 17.50                                          |
| ready-to-eat cereal                   | 2           | 0.49                                | 17.99                                          |
| pizza, pasta and other flour dishes   | 3           | 0.36                                | 18.36                                          |
| rice, cooked grains                   | 4           | 0.02                                | 18.38                                          |
| flour, bran, cooking ingredients      | 5           | 0.01                                | 18.39                                          |
| <b>Sub-group</b>                      |             |                                     |                                                |
| bread and rolls                       | 1           | 15.24                               | 15.24                                          |
| quick breads and other bread products | 2           | 2.26                                | 17.50                                          |
| breakfast cereals                     | 3           | 0.49                                | 17.99                                          |
| pizza and other flour dishes          | 4           | 0.31                                | 18.30                                          |
| pasta, macaroni, noodles              | 5           | 0.05                                | 18.36                                          |
| wheat flour                           | 6           | 0.01                                | 18.37                                          |
| rice                                  | 7           | 0.01                                | 18.38                                          |
| groats and cereal grains              | 8           | 0.01                                | 18.39                                          |



**Table S14.** Food sources of potassium contribution from cereals and cereal products in the average Polish diet

| <b>Main Group<br/>Sub-group</b>       | <b>Rank</b> | <b>% of<br/>Potassium<br/>Contribution</b> | <b>Cumulative % of<br/>Potassium<br/>Contribution</b> |
|---------------------------------------|-------------|--------------------------------------------|-------------------------------------------------------|
| <b>Main Group</b>                     |             |                                            |                                                       |
| bread, rolls, bread products          | 1           | 12.19                                      | 12.19                                                 |
| pizza, pasta and other flour dishes   | 2           | 1.37                                       | 13.56                                                 |
| flour, bran, cooking ingredients      | 3           | 1.35                                       | 14.91                                                 |
| rice, cooked grains                   | 4           | 0.87                                       | 15.78                                                 |
| ready-to-eat cereal                   | 5           | 0.85                                       | 16.64                                                 |
| <b>Sub-group</b>                      |             |                                            |                                                       |
| bread and rolls                       | 1           | 10.11                                      | 10.11                                                 |
| quick breads and other bread products | 2           | 2.08                                       | 12.19                                                 |
| wheat flour                           | 3           | 1.31                                       | 13.50                                                 |
| pasta, macaroni, noodles              | 4           | 1.01                                       | 14.51                                                 |
| breakfast cereals                     | 5           | 0.85                                       | 15.36                                                 |
| groats and cereal grains              | 6           | 0.53                                       | 15.89                                                 |
| pizza and other flour dishes          | 7           | 0.36                                       | 16.25                                                 |
| rice                                  | 8           | 0.35                                       | 16.59                                                 |
| other flours                          | 9           | 0.04                                       | 16.64                                                 |

**Table S15.** Food sources of magnesium contribution from cereals and cereal products in the average Polish diet

| <b>Main Group<br/>Sub-group</b>       | <b>Rank</b> | <b>% of<br/>Magnesium<br/>Contribution</b> | <b>Cumulative % of<br/>Magnesium<br/>Contribution</b> |
|---------------------------------------|-------------|--------------------------------------------|-------------------------------------------------------|
| <b>Main Group</b>                     |             |                                            |                                                       |
| bread, rolls, bread products          | 1           | 20.97                                      | 20.97                                                 |
| rice, cooked grains                   | 2           | 2.68                                       | 23.65                                                 |
| ready-to-eat cereal                   | 3           | 2.48                                       | 26.13                                                 |
| flour, bran, cooking ingredients      | 4           | 2.07                                       | 28.20                                                 |
| pizza, pasta and other flour dishes   | 5           | 2.03                                       | 30.23                                                 |
| <b>Sub-group</b>                      |             |                                            |                                                       |
| bread and rolls                       | 1           | 18.11                                      | 18.11                                                 |
| quick breads and other bread products | 2           | 2.86                                       | 20.97                                                 |
| breakfast cereals                     | 3           | 2.48                                       | 23.45                                                 |
| wheat flour                           | 4           | 1.95                                       | 25.39                                                 |
| groats and cereal grains              | 5           | 1.77                                       | 27.16                                                 |
| pasta, macaroni, noodles              | 6           | 1.71                                       | 28.87                                                 |
| rice                                  | 7           | 0.91                                       | 29.79                                                 |
| pizza and other flour dishes          | 8           | 0.32                                       | 30.10                                                 |
| other flours                          | 9           | 0.12                                       | 30.23                                                 |

**Table S16.** Food sources of iron contribution from cereals and cereal products in the average Polish diet

| <b>Main Group</b>                     | <b>Rank</b> | <b>% of Iron Contribution</b> | <b>Cumulative % of Iron Contribution</b> |
|---------------------------------------|-------------|-------------------------------|------------------------------------------|
| <b>Sub-group</b>                      |             |                               |                                          |
| <b>Main Group</b>                     |             |                               |                                          |
| bread, rolls, bread products          | 1           | 24.93                         | 24.93                                    |
| flour, bran, cooking ingredients      | 2           | 3.26                          | 28.18                                    |
| ready-to-eat cereal                   | 3           | 2.98                          | 31.17                                    |
| pizza, pasta and other flour dishes   | 4           | 2.24                          | 33.41                                    |
| rice, cooked grains                   | 5           | 1.73                          | 35.14                                    |
| <b>Sub-group</b>                      |             |                               |                                          |
| bread and rolls                       | 1           | 20.35                         | 20.35                                    |
| quick breads and other bread products | 2           | 4.58                          | 24.93                                    |
| wheat flour                           | 3           | 3.14                          | 28.07                                    |
| breakfast cereals                     | 4           | 2.98                          | 31.05                                    |
| pasta, macaroni, noodles              | 5           | 1.67                          | 32.73                                    |
| groats and cereal grains              | 6           | 1.22                          | 33.95                                    |
| pizza and other flour dishes          | 7           | 0.56                          | 34.51                                    |
| rice                                  | 8           | 0.52                          | 35.02                                    |
| other flours                          | 9           | 0.11                          | 35.14                                    |

**Table S17.** Food sources of zinc contribution from cereals and cereal products in the average Polish diet

| <b>Main Group<br/>Sub-group</b>       | <b>Rank</b> | <b>% of Zinc<br/>Contribution</b> | <b>Cumulative % of Zinc<br/>Contribution</b> |
|---------------------------------------|-------------|-----------------------------------|----------------------------------------------|
| <b>Main Group</b>                     |             |                                   |                                              |
| bread, rolls, bread products          | 1           | 21.12                             | 21.12                                        |
| flour, bran, cooking ingredients      | 2           | 2.32                              | 23.44                                        |
| rice, cooked grains                   | 3           | 2.06                              | 25.50                                        |
| pizza, pasta and other flour dishes   | 4           | 1.75                              | 27.24                                        |
| ready-to-eat cereal                   | 5           | 1.36                              | 28.60                                        |
| <b>Sub-group</b>                      |             |                                   |                                              |
| bread and rolls                       | 1           | 18.59                             | 18.59                                        |
| quick breads and other bread products | 2           | 2.52                              | 21.12                                        |
| wheat flour                           | 3           | 2.23                              | 23.35                                        |
| breakfast cereals                     | 4           | 1.36                              | 24.70                                        |
| pasta, macaroni, noodles              | 5           | 1.29                              | 25.99                                        |
| groats and cereal grains              | 6           | 1.11                              | 27.11                                        |
| rice                                  | 7           | 0.95                              | 28.05                                        |
| pizza and other flour dishes          | 8           | 0.45                              | 28.51                                        |
| other flours                          | 9           | 0.09                              | 28.60                                        |

**Table S18.** Food sources of copper contribution from cereals and cereal products in the average Polish diet

| <b>Main Group<br/>Sub-group</b>       | <b>Rank</b> | <b>% of Copper<br/>Contribution</b> | <b>Cumulative % of<br/>Copper Contribution</b> |
|---------------------------------------|-------------|-------------------------------------|------------------------------------------------|
| <b>Main Group</b>                     |             |                                     |                                                |
| bread, rolls, bread products          | 1           | 22.14                               | 22.14                                          |
| flour, bran, cooking ingredients      | 2           | 2.59                                | 24.73                                          |
| rice, cooked grains                   | 3           | 2.44                                | 27.18                                          |
| pizza, pasta and other flour dishes   | 4           | 2.22                                | 29.40                                          |
| ready-to-eat cereal                   | 5           | 1.87                                | 31.26                                          |
| <b>Sub-group</b>                      |             |                                     |                                                |
| bread and rolls                       | 1           | 18.91                               | 18.91                                          |
| quick breads and other bread products | 2           | 3.24                                | 22.14                                          |
| wheat flour                           | 3           | 2.51                                | 24.65                                          |
| breakfast cereals                     | 4           | 1.87                                | 26.52                                          |
| pasta, macaroni, noodles              | 5           | 1.84                                | 28.36                                          |
| groats and cereal grains              | 6           | 1.43                                | 29.78                                          |
| rice                                  | 7           | 1.02                                | 30.80                                          |
| pizza and other flour dishes          | 8           | 0.38                                | 31.18                                          |
| other flours                          | 9           | 0.08                                | 31.26                                          |

**Table S19.** Food sources of manganese contribution from cereals and cereal products in the average Polish diet

| <b>Main Group<br/>Sub-group</b>       | <b>Rank</b> | <b>% of<br/>Manganese<br/>Contribution</b> | <b>Cumulative % of<br/>Manganese<br/>Contribution</b> |
|---------------------------------------|-------------|--------------------------------------------|-------------------------------------------------------|
| <b>Main Group</b>                     |             |                                            |                                                       |
| bread, rolls, bread products          | 1           | 48.55                                      | 48.55                                                 |
| rice, cooked grains                   | 2           | 4.54                                       | 53.09                                                 |
| ready-to-eat cereal                   | 3           | 4.41                                       | 57.50                                                 |
| flour, bran, cooking ingredients      | 4           | 3.98                                       | 61.47                                                 |
| pizza, pasta and other flour dishes   | 5           | 2.58                                       | 64.05                                                 |
| <b>Sub-group</b>                      |             |                                            |                                                       |
| bread and rolls                       | 1           | 45.11                                      | 45.11                                                 |
| breakfast cereals                     | 2           | 4.41                                       | 49.52                                                 |
| wheat flour                           | 3           | 3.76                                       | 53.28                                                 |
| quick breads and other bread products | 4           | 3.44                                       | 56.72                                                 |
| rice                                  | 5           | 2.43                                       | 59.15                                                 |
| pasta, macaroni, noodles              | 6           | 2.30                                       | 61.45                                                 |
| groats and cereal grains              | 7           | 2.11                                       | 63.56                                                 |
| pizza and other flour dishes          | 8           | 0.28                                       | 63.84                                                 |
| other flours                          | 9           | 0.22                                       | 64.05                                                 |

**Table S20.** Food sources of iodine contribution from cereals and cereal products in the average Polish diet

| <b>Main Group<br/>Sub-group</b>          | <b>Rank</b> | <b>% of Iodine<br/>Contribution</b> | <b>Cumulative % of<br/>Iodine Contribution</b> |
|------------------------------------------|-------------|-------------------------------------|------------------------------------------------|
| <b>Main Group</b>                        |             |                                     |                                                |
| bread, rolls, bread products             | 1           | 5.59                                | 5.59                                           |
| flour, bran, cooking ingredients         | 2           | 0.32                                | 5.91                                           |
| ready-to-eat cereal                      | 3           | 0.28                                | 6.19                                           |
| rice, cooked grains                      | 4           | 0.22                                | 6.41                                           |
| pizza, pasta and other flour dishes      | 5           | 0.20                                | 6.61                                           |
| <b>Sub-group</b>                         |             |                                     |                                                |
| bread and rolls                          | 1           | 5.37                                | 5.37                                           |
| wheat flour                              | 2           | 0.30                                | 5.67                                           |
| breakfast cereals                        | 3           | 0.28                                | 5.95                                           |
| quick breads and other bread<br>products | 4           | 0.22                                | 6.18                                           |
| pasta, macaroni, noodles                 | 5           | 0.17                                | 6.35                                           |
| groats and cereal grains                 | 6           | 0.11                                | 6.46                                           |
| rice                                     | 7           | 0.11                                | 6.57                                           |
| pizza and other flour dishes             | 8           | 0.03                                | 6.60                                           |
| bread and rolls                          | 1           | 5.37                                | 5.37                                           |

**Table S21.** Food sources of thiamin contribution from cereals and cereal products in the average Polish diet

| <b>Main Group<br/>Sub-group</b>          | <b>Rank</b> | <b>% of Thiamin<br/>Contribution</b> | <b>Cumulative % of<br/>Thiamin Contribution</b> |
|------------------------------------------|-------------|--------------------------------------|-------------------------------------------------|
| <b>Main Group</b>                        |             |                                      |                                                 |
| bread, rolls, bread products             | 1           | 17.42                                | 17.42                                           |
| flour, bran, cooking ingredients         | 2           | 4.53                                 | 21.95                                           |
| rice, cooked grains                      | 3           | 2.08                                 | 24.03                                           |
| ready-to-eat cereal                      | 4           | 2.05                                 | 26.07                                           |
| pizza, pasta and other flour dishes      | 5           | 1.93                                 | 28.01                                           |
| <b>Sub-group</b>                         |             |                                      |                                                 |
| bread and rolls                          | 1           | 14.93                                | 14.93                                           |
| wheat flour                              | 2           | 4.45                                 | 19.37                                           |
| quick breads and other bread<br>products | 3           | 2.50                                 | 21.87                                           |
| breakfast cereals                        | 4           | 2.05                                 | 23.92                                           |
| pasta, macaroni, noodles                 | 5           | 1.59                                 | 25.50                                           |
| groats and cereal grains                 | 6           | 1.33                                 | 26.83                                           |
| rice                                     | 7           | 0.75                                 | 27.58                                           |
| pizza and other flour dishes             | 8           | 0.35                                 | 27.93                                           |
| other flours                             | 9           | 0.08                                 | 28.01                                           |



**Table S22.** Food sources of riboflavin contribution from cereals and cereal products in the average Polish diet

| <b>Main Group<br/>Sub-group</b>          | <b>Rank</b> | <b>% of Riboflavin<br/>Contribution</b> | <b>Cumulative % of<br/>Riboflavin<br/>Contribution</b> |
|------------------------------------------|-------------|-----------------------------------------|--------------------------------------------------------|
| <b>Main Group</b>                        |             |                                         |                                                        |
| bread, rolls, bread products             | 1           | 11.19                                   | 11.19                                                  |
| flour, bran, cooking ingredients         | 2           | 2.76                                    | 13.95                                                  |
| pizza, pasta and other flour dishes      | 3           | 1.48                                    | 15.42                                                  |
| ready-to-eat cereal                      | 4           | 1.13                                    | 16.56                                                  |
| rice, cooked grains                      | 5           | 0.53                                    | 17.08                                                  |
| <b>Sub-group</b>                         |             |                                         |                                                        |
| bread and rolls                          | 1           | 8.69                                    | 8.69                                                   |
| wheat flour                              | 2           | 2.70                                    | 11.40                                                  |
| quick breads and other bread<br>products | 3           | 2.50                                    | 13.89                                                  |
| breakfast cereals                        | 4           | 1.13                                    | 15.03                                                  |
| pasta, macaroni, noodles                 | 5           | 0.94                                    | 15.97                                                  |
| pizza and other flour dishes             | 6           | 0.53                                    | 16.50                                                  |
| groats and cereal grains                 | 7           | 0.41                                    | 16.91                                                  |
| rice                                     | 8           | 0.12                                    | 17.03                                                  |
| other flours                             | 9           | 0.06                                    | 17.08                                                  |

**Table S23.** Food sources of niacin contribution from cereals and cereal products in the average Polish diet

| <b>Main Group<br/>Sub-group</b>       | <b>Rank</b> | <b>% of Niacin<br/>Contribution</b> | <b>Cumulative % of<br/>Niacin Contribution</b> |
|---------------------------------------|-------------|-------------------------------------|------------------------------------------------|
| <b>Main Group</b>                     |             |                                     |                                                |
| bread, rolls, bread products          | 1           | 11.22                               | 11.22                                          |
| flour, bran, cooking ingredients      | 2           | 3.83                                | 15.06                                          |
| ready-to-eat cereal                   | 3           | 1.50                                | 16.55                                          |
| rice, cooked grains                   | 4           | 1.30                                | 17.85                                          |
| pizza, pasta and other flour dishes   | 5           | 1.29                                | 19.14                                          |
| <b>Sub-group</b>                      |             |                                     |                                                |
| bread and rolls                       | 1           | 9.62                                | 9.62                                           |
| wheat flour                           | 2           | 3.79                                | 13.42                                          |
| quick breads and other bread products | 3           | 1.60                                | 15.01                                          |
| breakfast cereals                     | 4           | 1.50                                | 16.51                                          |
| pasta, macaroni, noodles              | 5           | 0.92                                | 17.44                                          |
| rice                                  | 6           | 0.78                                | 18.21                                          |
| groats and cereal grains              | 7           | 0.52                                | 18.73                                          |
| pizza and other flour dishes          | 8           | 0.37                                | 19.10                                          |
| other flours                          | 9           | 0.04                                | 19.14                                          |

**Table S24.** Food sources of vitamin B6 contribution from cereals and cereal products in the average Polish diet

| Main Group<br>Sub-group                  | Rank | % of Vitamin B6<br>Contribution | Cumulative % of<br>Vitamin<br>B6Contribution |
|------------------------------------------|------|---------------------------------|----------------------------------------------|
| <b>Main Group</b>                        |      |                                 |                                              |
| bread, rolls, bread products             | 1    | 8.43                            | 8.43                                         |
| flour, bran, cooking ingredients         | 2    | 2.47                            | 10.90                                        |
| rice, cooked grains                      | 3    | 1.96                            | 12.87                                        |
| ready-to-eat cereal                      | 4    | 1.56                            | 14.42                                        |
| pizza, pasta and other flour dishes      | 5    | 1.10                            | 15.52                                        |
| <b>Sub-group</b>                         |      |                                 |                                              |
| bread and rolls                          | 1    | 7.49                            | 7.49                                         |
| wheat flour                              | 2    | 2.41                            | 9.90                                         |
| breakfast cereals                        | 3    | 1.56                            | 11.45                                        |
| groats and cereal grains                 | 4    | 1.04                            | 12.49                                        |
| quick breads and other bread<br>products | 5    | 0.95                            | 13.44                                        |
| rice                                     | 6    | 0.93                            | 14.37                                        |
| pasta, macaroni, noodles                 | 7    | 0.83                            | 15.20                                        |
| pizza and other flour dishes             | 8    | 0.26                            | 15.46                                        |
| other flours                             | 9    | 0.06                            | 15.52                                        |

**Table S25.** Food sources of folate contribution from cereals and cereal products in the average Polish diet

| <b>Main Group<br/>Sub-group</b>          | <b>Rank</b> | <b>% of Folate<br/>Contribution</b> | <b>Cumulative % of<br/>Folate Contribution</b> |
|------------------------------------------|-------------|-------------------------------------|------------------------------------------------|
| <b>Main Group</b>                        |             |                                     |                                                |
| bread, rolls, bread products             | 1           | 20.67                               | 20.67                                          |
| flour, bran, cooking ingredients         | 2           | 6.34                                | 27.00                                          |
| pizza, pasta and other flour dishes      | 3           | 3.27                                | 30.28                                          |
| ready-to-eat cereal                      | 4           | 1.87                                | 32.14                                          |
| rice, cooked grains                      | 5           | 1.43                                | 33.57                                          |
| <b>Sub-group</b>                         |             |                                     |                                                |
| bread and rolls                          | 1           | 16.96                               | 16.96                                          |
| wheat flour                              | 2           | 6.27                                | 23.24                                          |
| quick breads and other bread<br>products | 3           | 3.70                                | 26.94                                          |
| pasta, macaroni, noodles                 | 4           | 2.76                                | 29.70                                          |
| breakfast cereals                        | 5           | 1.87                                | 31.57                                          |
| groats and cereal grains                 | 6           | 0.73                                | 32.30                                          |
| rice                                     | 7           | 0.70                                | 33.00                                          |
| pizza and other flour dishes             | 8           | 0.51                                | 33.51                                          |
| other flours                             | 9           | 0.07                                | 33.57                                          |

**Table S26.** Food sources of vitamin B12 contribution from cereals and cereal products in the average Polish diet

| <b>Main Group<br/>Sub-group</b>     | <b>Rank</b> | <b>% of Vitamin<br/>B12<br/>Contribution</b> | <b>Cumulative % of<br/>Vitamin B12<br/>Contribution</b> |
|-------------------------------------|-------------|----------------------------------------------|---------------------------------------------------------|
| <b>Main Group</b>                   |             |                                              |                                                         |
| bread, rolls, bread products        | 1           | 1.84                                         | 1.84                                                    |
| pizza, pasta and other flour dishes | 2           | 0.83                                         | 2.67                                                    |
| flour, bran, cooking ingredients    | 3           | 0.55                                         | 3.21                                                    |
| ready-to-eat cereal                 | 4           | 0.17                                         | 3.39                                                    |
| <b>Sub-group</b>                    |             |                                              |                                                         |
| quick breads and other bread        |             |                                              |                                                         |
| products                            | 1           | 1.17                                         | 1.17                                                    |
| bread and rolls                     | 2           | 0.67                                         | 1.84                                                    |
| wheat flour                         | 3           | 0.55                                         | 2.39                                                    |
| pasta, macaroni, noodles            | 4           | 0.45                                         | 2.84                                                    |
| pizza and other flour dishes        | 5           | 0.38                                         | 3.21                                                    |
| breakfast cereals                   | 6           | 0.17                                         | 3.39                                                    |

**Table S27.** Food sources of vitamin A contribution from cereals and cereal products in the average Polish diet

| <b>Main Group<br/>Sub-group</b>     | <b>Rank</b> | <b>% of Vitamin A<br/>Contribution</b> | <b>Cumulative % of<br/>Vitamin A<br/>Contribution</b> |
|-------------------------------------|-------------|----------------------------------------|-------------------------------------------------------|
| <b>Food Group</b>                   |             |                                        |                                                       |
| bread, rolls, bread products        | 1           | 3.25                                   | 3.25                                                  |
| pizza, pasta and other flour dishes | 2           | 1.41                                   | 4.66                                                  |
| ready-to-eat cereal                 | 3           | 0.05                                   | 4.71                                                  |
| <b>Sub-group</b>                    |             |                                        |                                                       |
| quick breads and other bread        |             |                                        |                                                       |
| products                            | 1           | 2.38                                   | 2.38                                                  |
| pasta, macaroni, noodles            | 2           | 0.98                                   | 3.36                                                  |
| bread and rolls                     | 3           | 0.88                                   | 4.24                                                  |
| pizza and other flour dishes        | 4           | 0.42                                   | 4.66                                                  |
| breakfast cereals                   | 5           | 0.05                                   | 4.71                                                  |

**Table S28.** Food sources of vitamin D contribution from cereals and cereal products in the average Polish diet

| <b>Main Group<br/>Sub-group</b>     | <b>Rank</b> | <b>% of<br/>Vitamin D<br/>Contribution</b> | <b>Cumulative % of<br/>Vitamin D<br/>Contribution</b> |
|-------------------------------------|-------------|--------------------------------------------|-------------------------------------------------------|
| <b>Main Group</b>                   |             |                                            |                                                       |
| bread, rolls, bread products        | 1           | 4.61                                       | 4.61                                                  |
| pizza, pasta and other flour dishes | 2           | 0.81                                       | 5.41                                                  |
| <b>Sub-group</b>                    |             |                                            |                                                       |
| quick breads, bread products        | 1           | 3.04                                       | 3.04                                                  |
| bread and rolls                     | 2           | 1.56                                       | 4.61                                                  |
| pasta, macaroni, noodles            | 3           | 0.54                                       | 5.15                                                  |
| pizza and other flour dishes        | 4           | 0.27                                       | 5.41                                                  |

**Table S29.** Food sources of vitamin E contribution from cereals and cereal products in the average Polish diet

| <b>Main Group<br/>Sub-group</b>       | <b>Rank</b> | <b>% of<br/>Vitamin E<br/>Contribution</b> | <b>Cumulative % of<br/>Vitamin E<br/>Contribution</b> |
|---------------------------------------|-------------|--------------------------------------------|-------------------------------------------------------|
| <b>Main Group</b>                     |             |                                            |                                                       |
| bread, rolls, bread products          | 1           | 12.27                                      | 12.27                                                 |
| pizza, pasta and other flour dishes   | 2           | 1.02                                       | 13.29                                                 |
| flour, bran, cooking ingredients      | 3           | 0.98                                       | 14.28                                                 |
| ready-to-eat cereal                   | 4           | 0.83                                       | 15.11                                                 |
| rice, cooked grains                   | 5           | 0.39                                       | 15.50                                                 |
| <b>Sub-group</b>                      |             |                                            |                                                       |
| bread and rolls                       | 1           | 8.37                                       | 8.37                                                  |
| quick breads and other bread products | 2           | 3.90                                       | 12.27                                                 |
| wheat flour                           | 3           | 0.97                                       | 13.24                                                 |
| breakfast cereals                     | 4           | 0.83                                       | 14.06                                                 |
| pizza and other flour dishes          | 5           | 0.57                                       | 14.63                                                 |
| pasta, macaroni, noodles              | 6           | 0.46                                       | 15.09                                                 |
| rice                                  | 7           | 0.23                                       | 15.31                                                 |
| groats and cereal grains              | 8           | 0.16                                       | 15.48                                                 |
| other flours                          | 9           | 0.02                                       | 15.50                                                 |



**Table S30.** Food sources of vitamin C contribution from cereals and cereal products in the average Polish diet

| <b>Main Group<br/>Sub-group</b>          | <b>Rank</b> | <b>% of Vitamin<br/>C<br/>Contribution</b> | <b>Cumulative % of<br/>Vitamin C<br/>Contribution</b> |
|------------------------------------------|-------------|--------------------------------------------|-------------------------------------------------------|
| <b>Main Group</b>                        |             |                                            |                                                       |
| pizza, pasta and other flour dishes      | 1           | 0.78                                       | 0.78                                                  |
| ready-to-eat cereal                      | 2           | 0.53                                       | 1.31                                                  |
| bread, rolls, bread products             | 3           | 0.25                                       | 1.55                                                  |
| <b>Sub-group</b>                         |             |                                            |                                                       |
| pasta, macaroni, noodles                 | 1           | 0.59                                       | 0.59                                                  |
| breakfast cereals                        | 2           | 0.53                                       | 1.11                                                  |
| pizza and other flour dishes             | 3           | 0.19                                       | 1.31                                                  |
| quick breads and other bread<br>products | 4           | 0.15                                       | 1.45                                                  |
| bread and rolls                          | 5           | 0.10                                       | 1.55                                                  |
